# Supplementary material for: Facile and eco-friendly extraction of cellulose nanocrystalsviaelectron beam irradiation followed by high-pressure homogenization
Source: Royal Society of Chemistry journal article supplement (doi:10.1039/c8gc00577j), 2018-01-01
Supplement: c8gc00577j1.pdf [file c8gc00577j1.pdf]

Supplementary Information

**Facile and Eco-friendly Extraction of Cellulose Nanocrystals *via* Electron Beam Irradiation  
Followed by High-pressure Homogenization†**

Minwoo Lee,<sup>‡a</sup> Min Haeng Heo,<sup>‡a,b</sup> Hyunho Lee,<sup>a,b</sup> Hwi-Hui Lee,<sup>a</sup> Haemin Jeong,<sup>a,b</sup> Young-Wun Kim,<sup>\*a,b</sup> and Jihoon Shin<sup>\*a,b</sup>

<sup>a</sup>*Center for Environment & Sustainable Resources, Korea Research Institute of Chemical Technology, 141 Gajeong-ro, Yuseong-gu, Daejeon, 34114, Korea. E-mail: ywkim@kRICT.re.kr, jshin@kRICT.re.kr*

<sup>b</sup>*Department of Advanced Materials & Chemical Engineering, University of Science & Technology, 217 Gajeong-ro, Yuseong-gu, Daejeon, 34113, Korea*

†Electronic supplementary information (ESI) available. See DOI:

‡These authors contributed equally to this work.

**Table of contents**

|         |                                                                                                                                                                                                                                                                                                                                                                   |         |
|---------|-------------------------------------------------------------------------------------------------------------------------------------------------------------------------------------------------------------------------------------------------------------------------------------------------------------------------------------------------------------------|---------|
| Fig. S1 | SEM images of (a) cellulose pulp treated by EBI with 2000 kGy (inset: photos of used pulp sheet and cellulose pulp powder obtained after grinding), and (b and c) EBI-treated cellulose pulps after cooking with DI water or NaOH solution (adjusted to pH 9–10), respectively (insets: the filtrate solutions after water- or alkaline-treatment).               | Page S2 |
| Fig. S2 | (a) Images of aqueous suspensions (0.3% w/v) of the CNCs directly disintegrated by high pressure homogenization, which were taken after free settling for two months at room temperature. (b) Photos showing the Tyndall scattering effect (He–Ne laser, 632.8 nm), confirming the presence of nanoparticles.                                                     | Page S3 |
| Fig. S3 | TEM images of CNC samples extracted from cellulose pulps disassociated by electron-beam irradiation or/and chemicals, including an industrially produced CNC. (a) CN-P-E0500, (b) CN-P-E1000, (c) CN-P-E1500, (d) CN-P-E2000, (e) CN-P-E2500, (f) CN-P-E3000, (g) CN-P-CN, (h) CN-P-E1500/CN, (i) CN-P-E1500/CP, and (j) NCCTM as the CNC produced by CelluForce. | Page S4 |
| Fig. S4 | Length (left column) and height (right column) distribution histograms and average values $\pm$ one standard deviation for EBI-induced and sulfuric acid-hydrolyzed CNCs (CN-P-E series and CN-P-CN).                                                                                                                                                             | Page S5 |
| Fig. S5 | X-ray diffraction of the CNC suspensions.                                                                                                                                                                                                                                                                                                                         | Page S6 |
| Fig. S6 | TGA thermograms of the further oxidized/cationized CNCs, including CN-P-CN prepared through sulfuric acid hydrolysis and NCC <sup>TM</sup> . The insets show the DTG curves.                                                                                                                                                                                      | Page S7 |

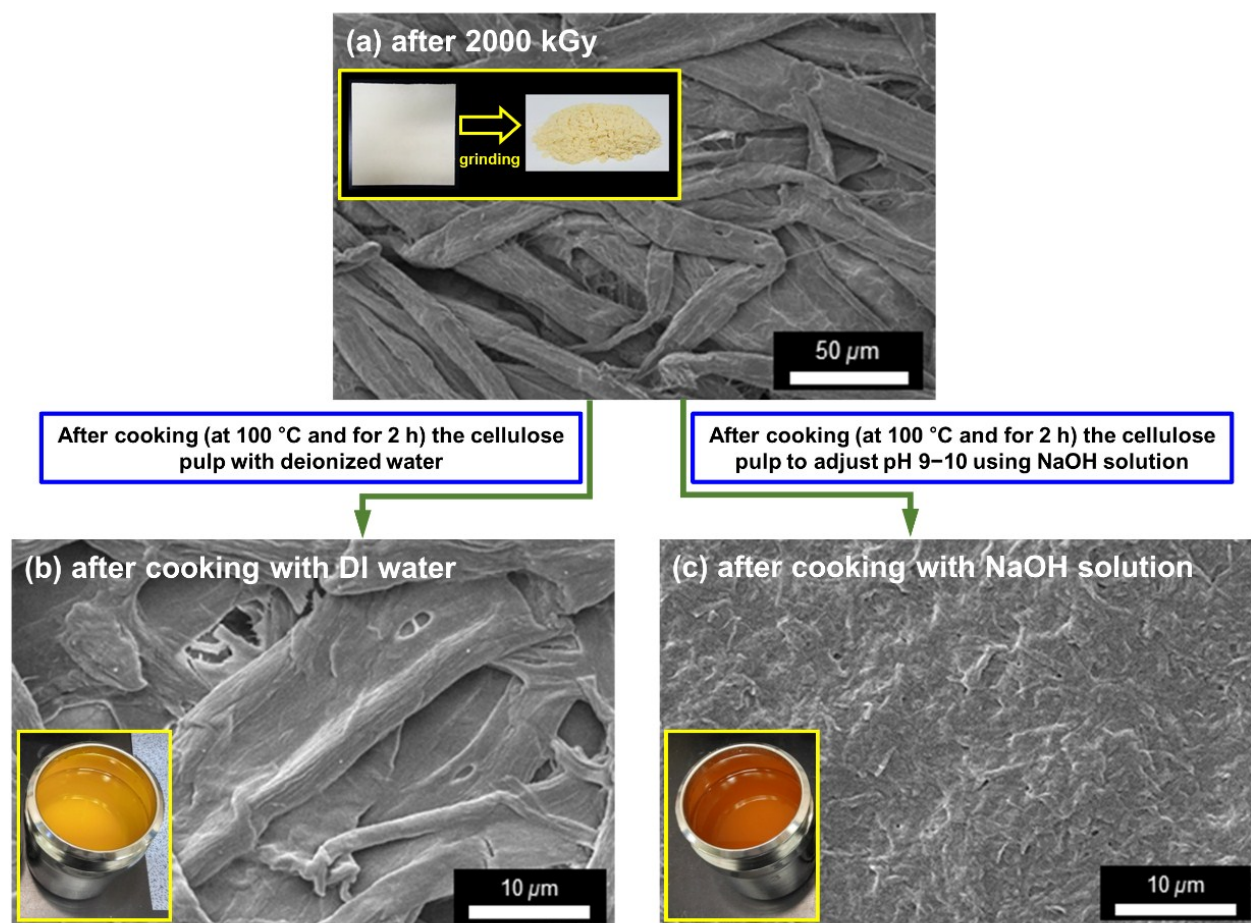

**Fig. S1** SEM images of (a) cellulose pulp treated by EBI with 2000 kGy (inset: photos of used pulp sheet and cellulose pulp powder obtained after grinding), and (b and c) EBI-treated cellulose pulps after cooking with DI water or NaOH solution (adjusted to pH 9–10), respectively (insets: the filtrate solutions after water- or alkaline-treatment).

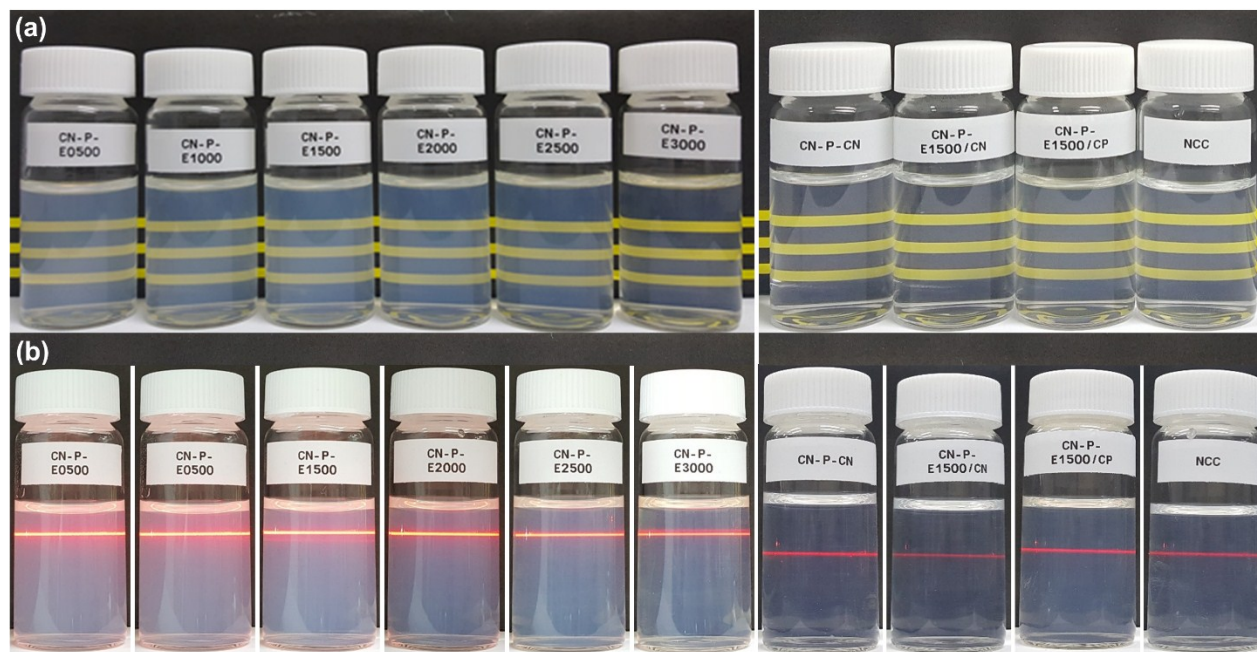

**Fig. S2** (a) Images of aqueous suspensions (0.3% w/v) of the CNCs directly disintegrated by high pressure homogenization, which were taken after free settling for two months at room temperature. (b) Photos showing the Tyndall scattering effect (He-Ne laser, 632.8 nm), confirming the presence of nanoparticles.

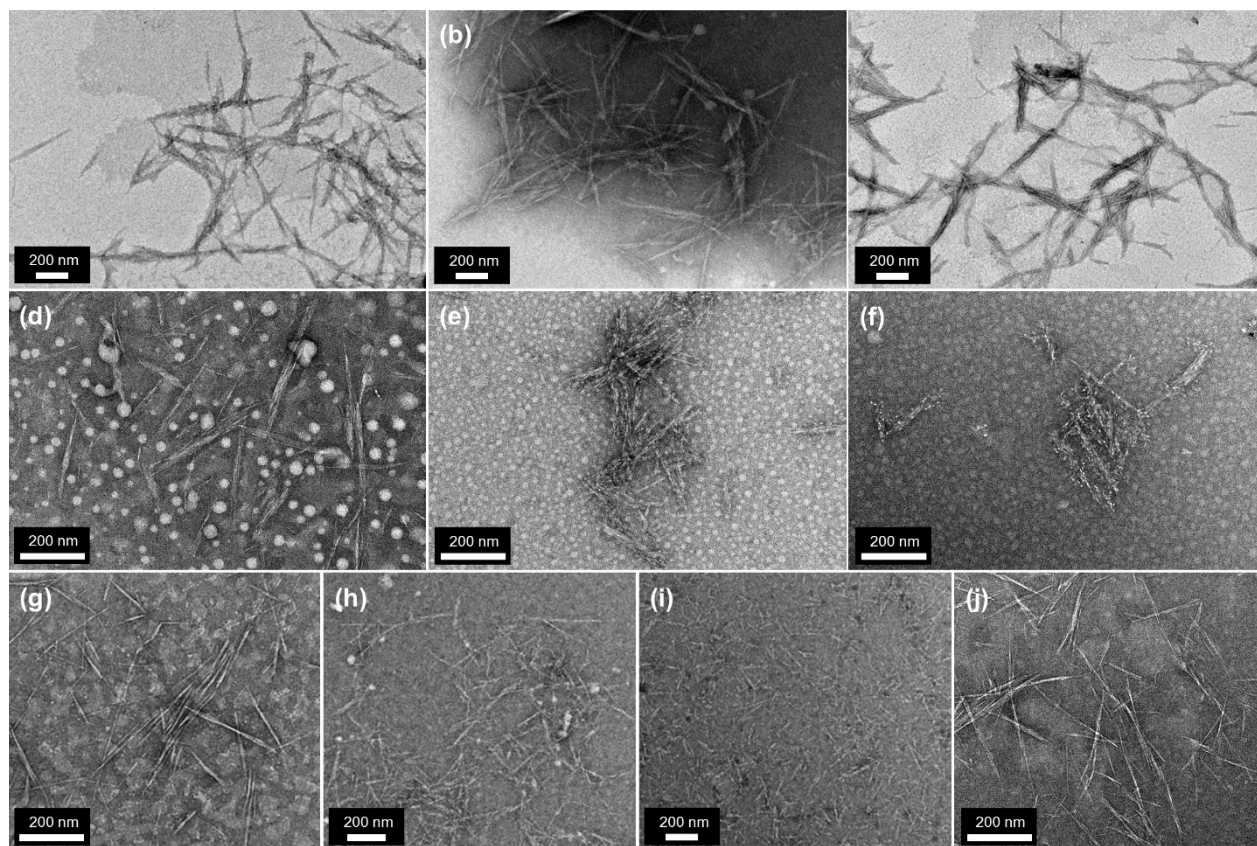

**Fig. S3** TEM images of CNC samples extracted from cellulose pulps disassociated by electron-beam irradiation or/and chemicals, including an industrially produced CNC. (a) CN-P-E0500, (b) CN-P-E1000, (c) CN-P-E1500, (d) CN-P-E2000, (e) CN-P-E2500, (f) CN-P-E3000, (g) CN-P-CN, (h) CN-P-E1500/CN, (i) CN-P-E1500/CP, and (j) NCC<sup>TM</sup> as the CNC produced by CelluForce.

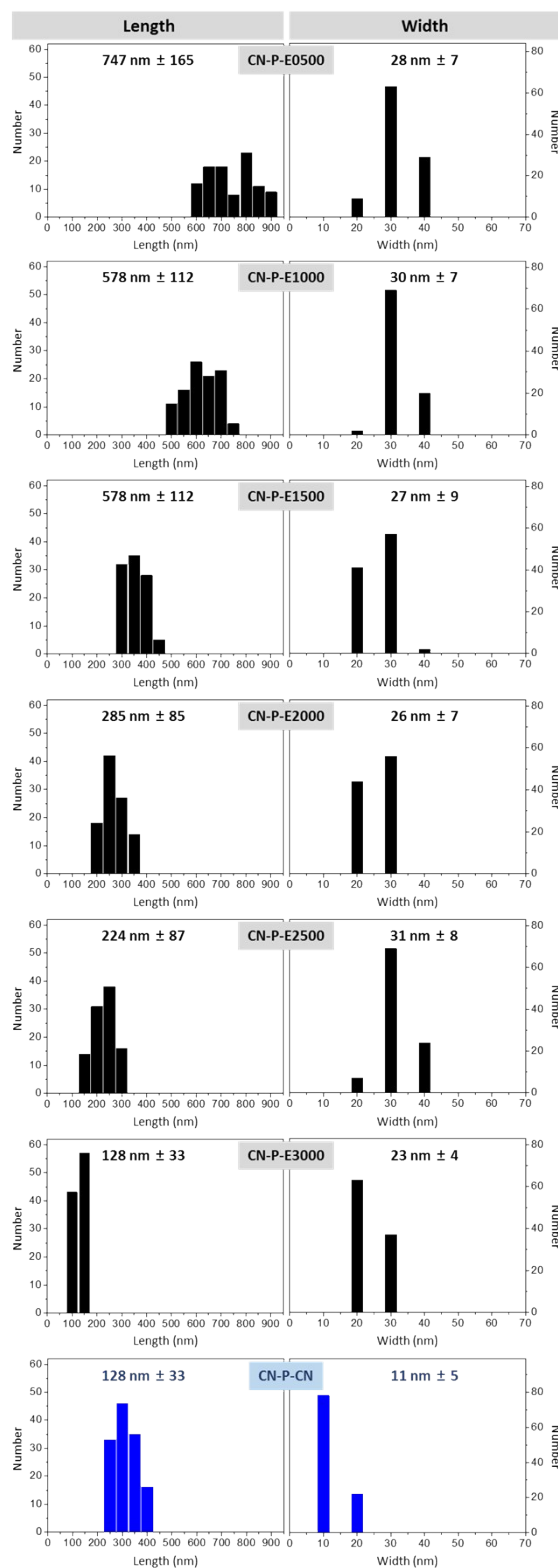

**Fig. S4** Length (left column) and height (right column) distribution histograms and average values  $\pm$  one standard deviation for EBI-induced and sulfuric acid-hydrolyzed CNCs (CN-P-E series and CN-P-CN).

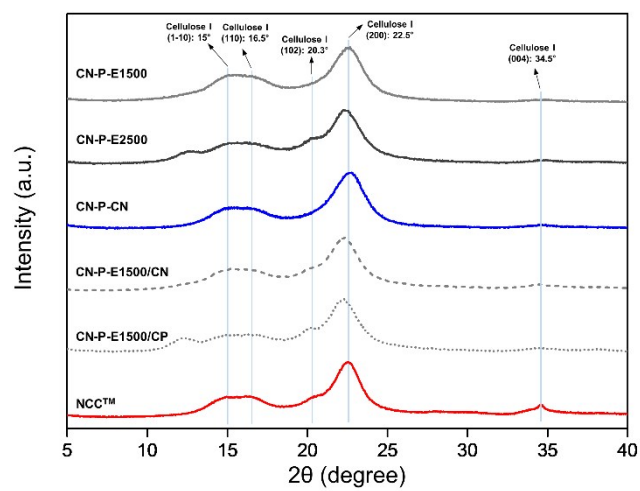

**Fig. S5** X-ray diffraction of the CNC suspensions.

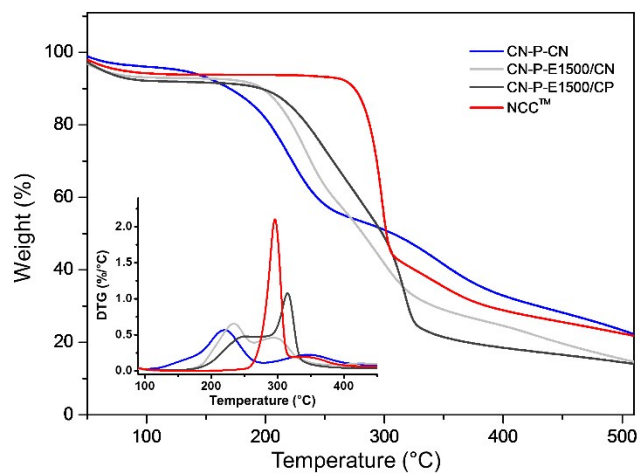

**Fig. S6** TGA thermograms of the further oxidized/cationized CNCs, including CN-P-CN prepared through sulfuric acid hydrolysis and NCC™. The insets show the DTG curves.



## Table of Contents

### Facile and Eco-friendly Extraction of Cellulose Nanocrystals *via* Electron Beam Irradiation Followed by High-pressure Homogenization

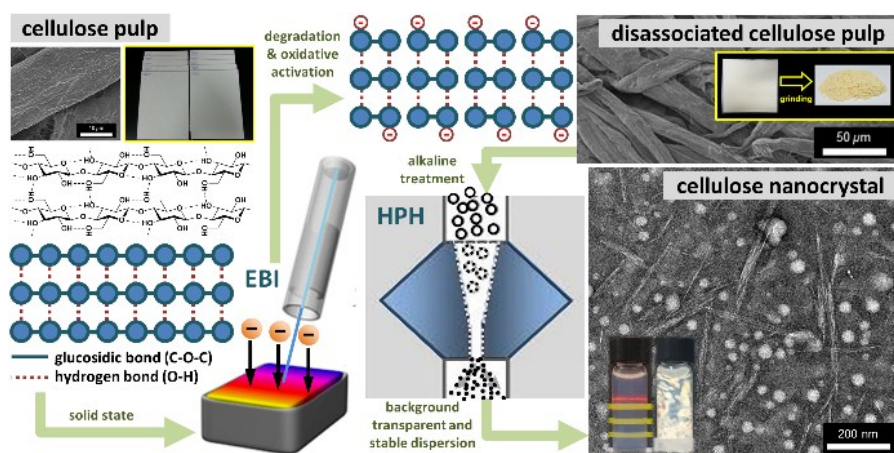

Cellulose nanocrystals were prepared *via* short-time pretreatment by electron-beam irradiation in the solid state and disintegration using high pressure homogenization.
